# Supplementary material for: MutationalPatterns: the one stop shop for the analysis of mutational processes
Source: PubMed Central journal article supplement (PMC8845394; doi:10.1186/s12864-022-08357-3), 2022-02-15
Supplement: 12864_2022_8357_MOESM1_ESM.pdf [file 12864_2022_8357_MOESM1_ESM.pdf]

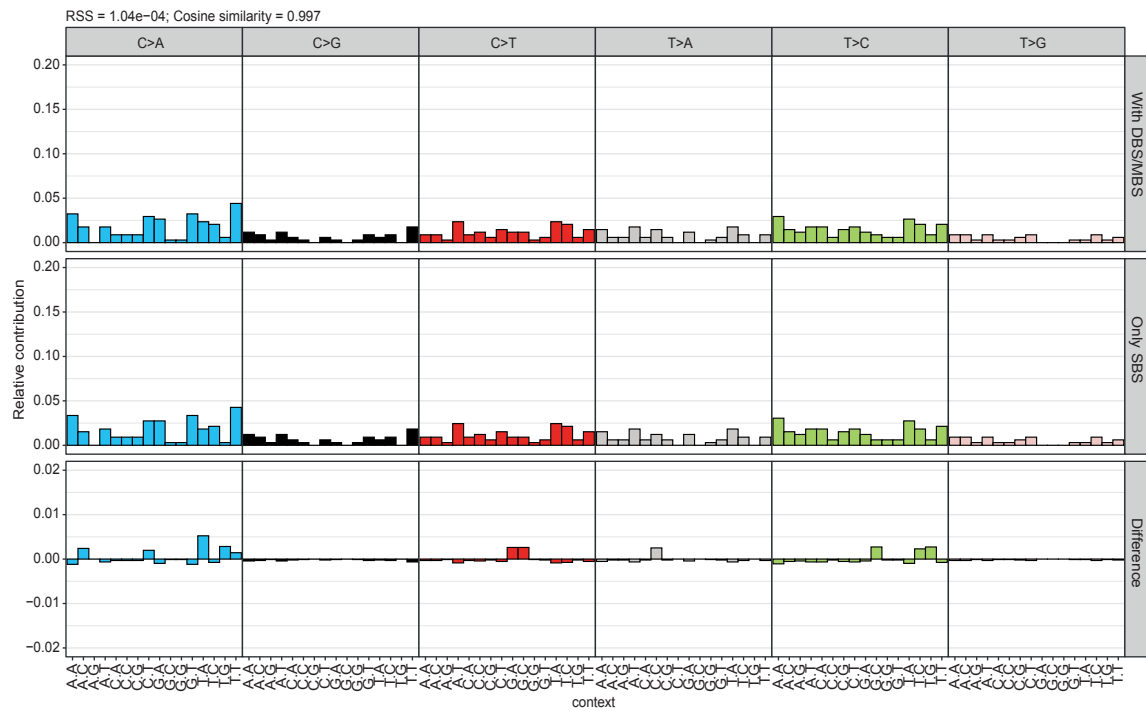

1

2 Fig. S1 Removing the DBSs and MBSs results in an improved SBS profile

3 Relative contribution of each of the 96 trinucleotide changes to the mutational profiles of

4 the wild-type sample. The upper panel shows the profile when DBSs and MBSs are

5 incorrectly classified as SBSs. The middle panel shows the profile with only the SBSs. The

6 lower panel shows the difference between these profiles.

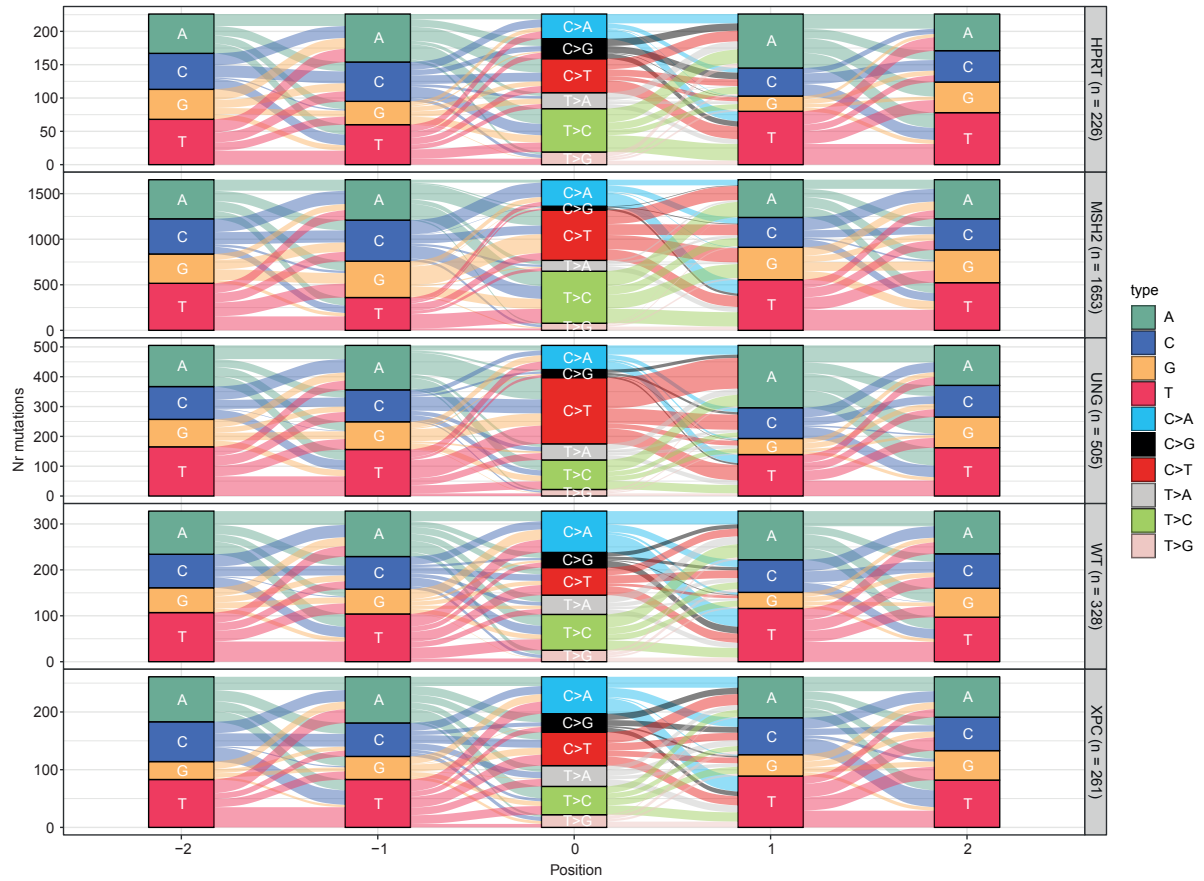

7

8 Fig. S2 Mutation contexts can be visualized with a river plot

9 A river plot depicting the indicated mutation types and the surrounding context for each

10 sample. The bars show the number of mutations or bases for each type. The flows show the

11 connections between the mutations and their context.

12

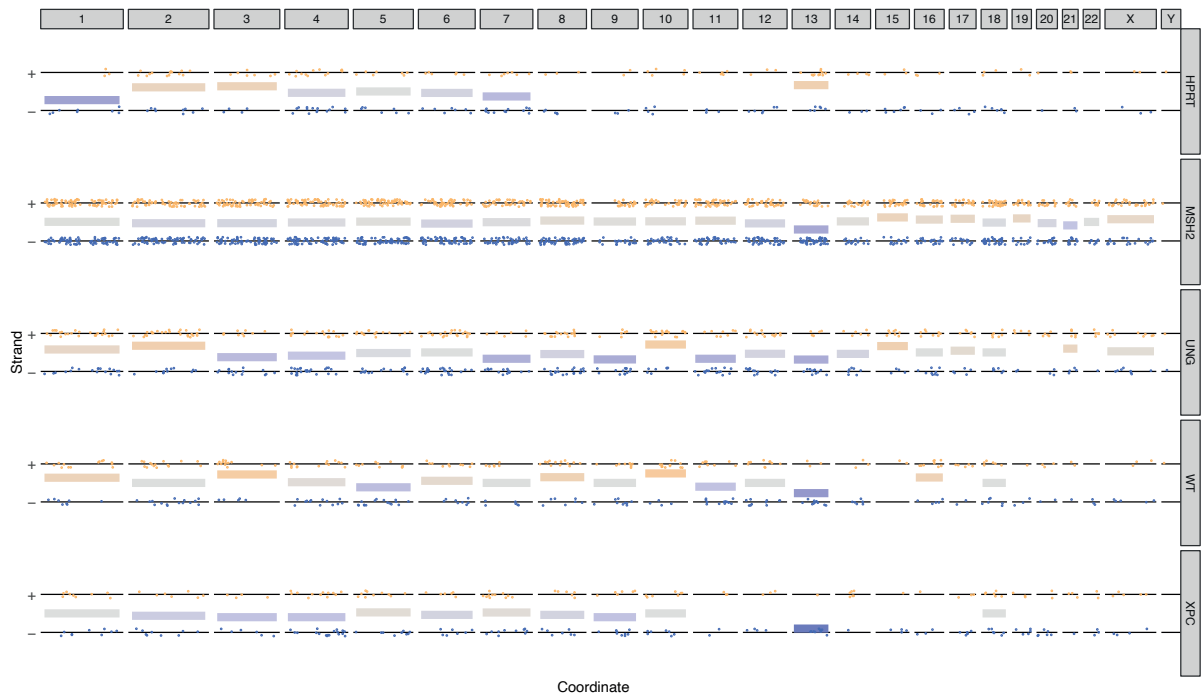

13

14 Fig. S3 Lesion segregation can be visualized

15 A jitter plot depicting the presence of lesion segregation for each sample per chromosome.

16 Each dot depicts a single base substitution. Any C>N or T>N is shown as a "+" strand

17 mutation, while G>N and A>N mutations are shown on the "-" strand. The x-axis shows the

18 position of the mutations. The horizontal lines are calculated as the mean of the "+" and "-"

19 strand, where "+" equals 1 and "-" equals 0. They indicate per chromosome on which strand

20 most of the mutations are located. In this example no lesion segregation was present.

21

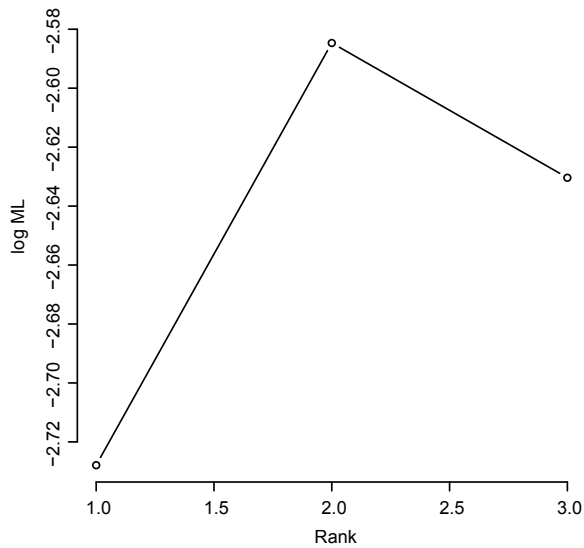

22

23 Fig. S4 Variational Bayes NMF can be used to predict the optimal number of signatures to  
 24 extract

25 The log maximum likelihood is shown for different ranks. The rank is the number of

26 signatures to extract. The highest likelihood shows the optimal rank. In this case this is 2.

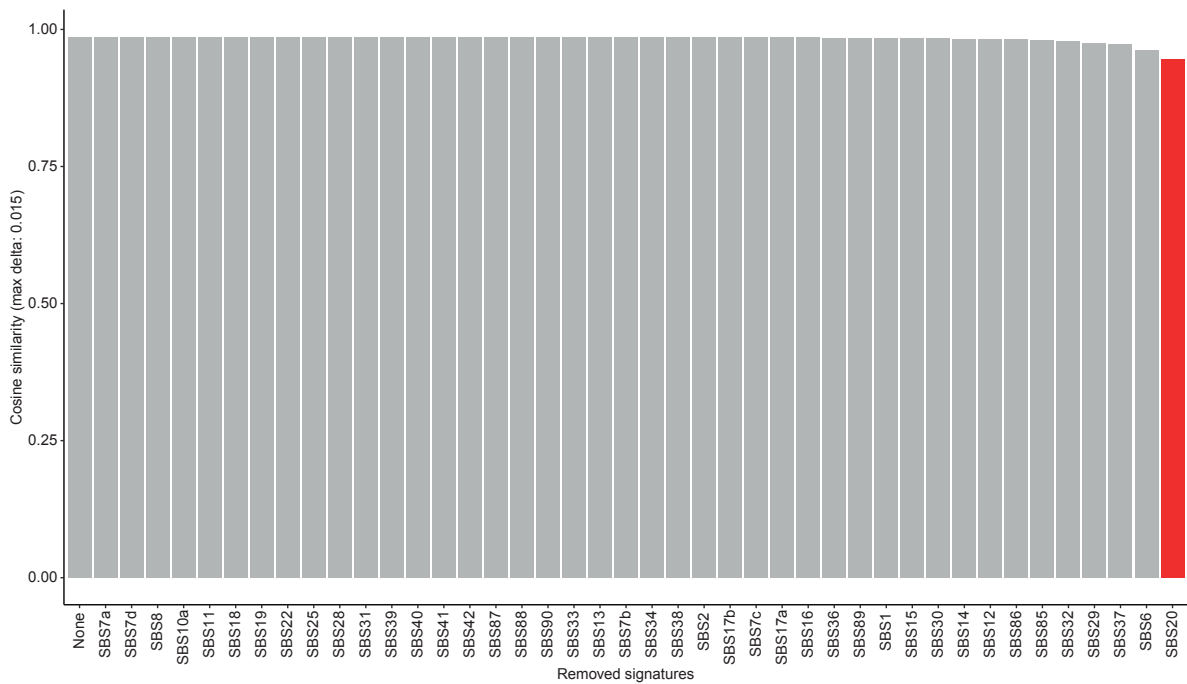

27

28 Fig. S5 Strict refitting iteratively removes signatures

29 The cosine similarity between the original and reconstructed profile of the *MSH2* knockout  
 30 during different iterations of the strict refitting process. The signatures with the lowest  
 31 contributions are iteratively removed and the cosine similarity is calculated. This is depicted  
 32 from left to right. Removing SBS20 decreased the cosine similarity more than the cutoff, so  
 33 it was retained, and the algorithm stopped.

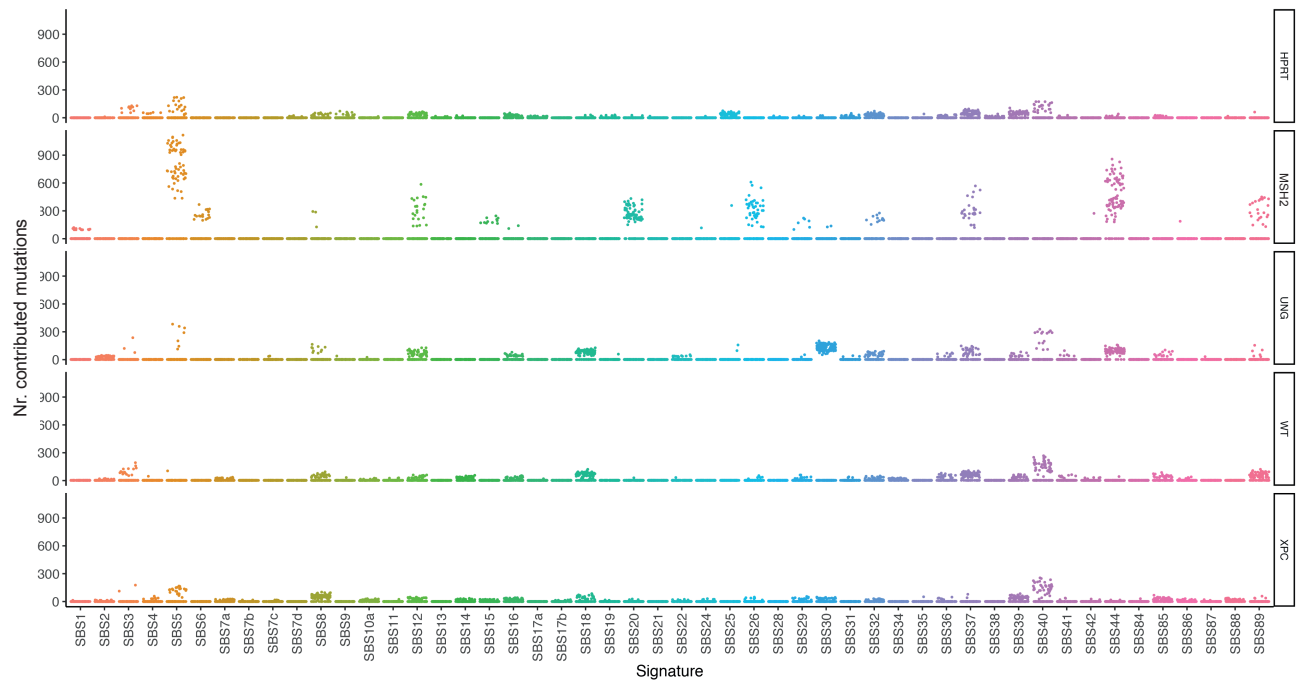

34  
 35 Fig. S6 Bootstrapped signature refitting can be visualized with a jitter plot  
 36 A jitter plot depicting the bootstrapped signature refitting for each sample. Each dot shows  
 37 the number of mutations contributed by a signature according to one bootstrap iteration.

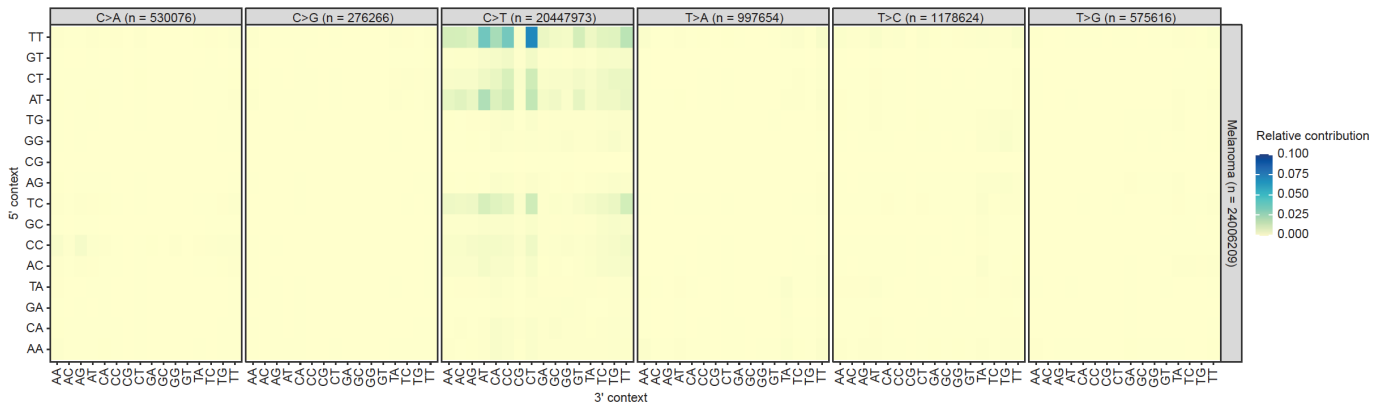

38

39 Fig. S7 TT[C>T]CT is the most common substitution type in metastatic melanomas

40 Heatmap depicting the relative contribution of the indicated mutation types and the

41 surrounding bases to the point mutation spectrum for metastatic melanomas. The total

42 number of somatic point mutations is indicated. In contrast to Fig. 4a, all substitutions are

43 shown.

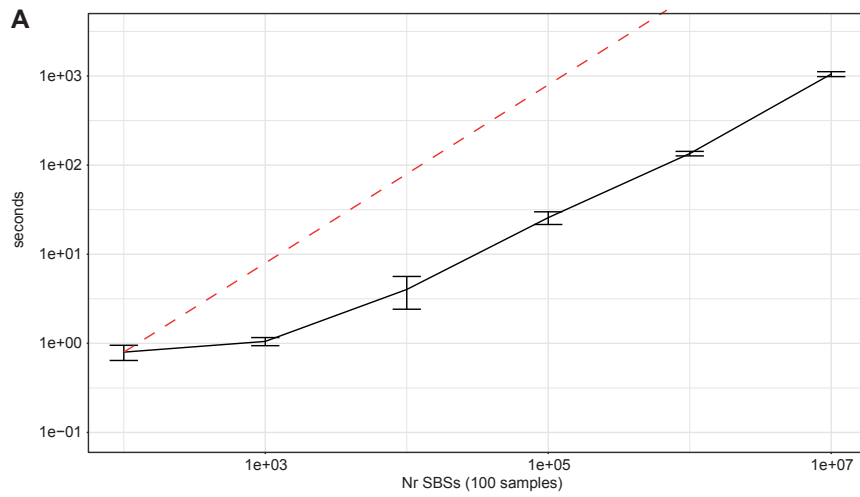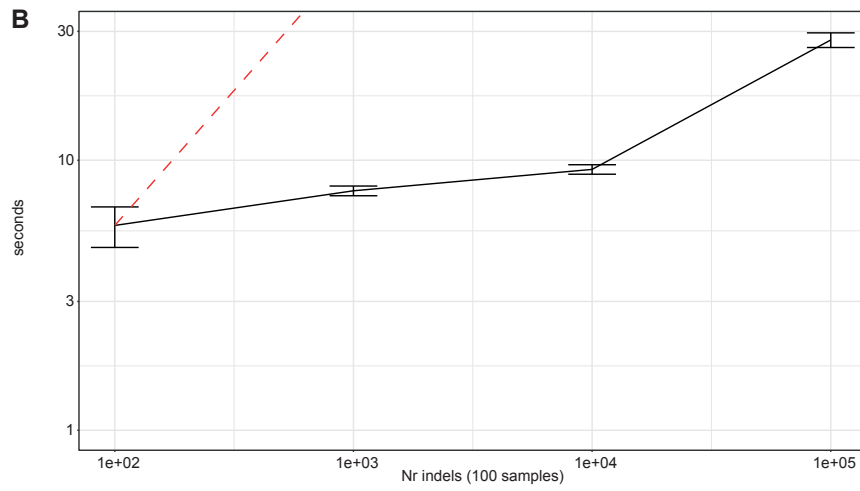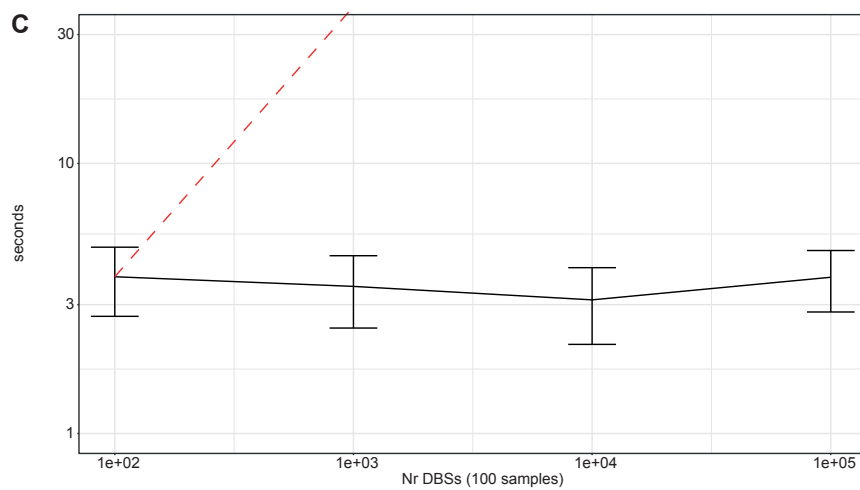

44

45 Fig. S8 The matrix generating functions have  $O(n)$  or better scaling

46 The y-axis shows the time it takes to generate a mutation matrix for the number of  
47 mutations on the x-axis for **a** SBSs, **b** indels and **c** DBSs. The mutations are always split over  
48 100 samples. The dashed red line indicates  $O(n)$  scaling. The SBS and indel functions  
49 approach  $O(n)$  scaling on large mutations sets. The runtime of the DBS function is  
50 independent of the number of mutations.

51

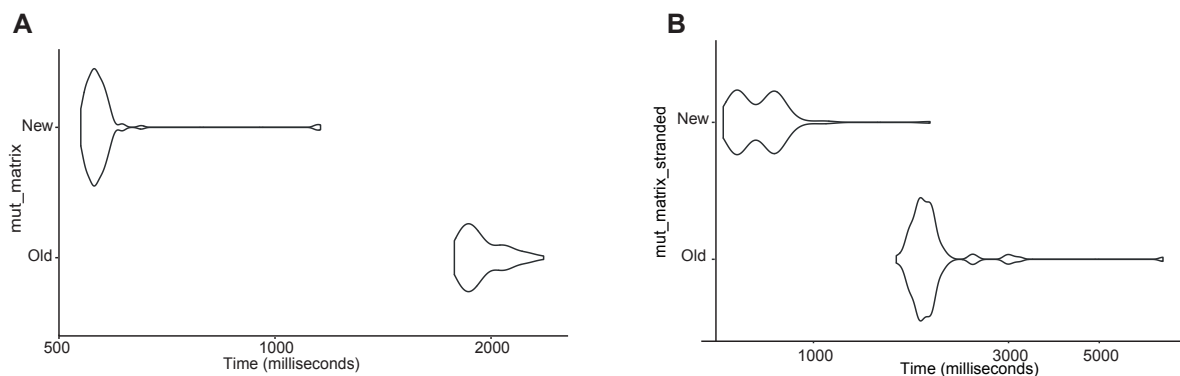

52

53

54 Fig. S9 Benchmark of the “mut\_matrix” function

55 Violin plot depicting the run-times of the new and the old versions of the **a** “mut\_matrix”  
56 and **b** “mut\_matrix\_stranded” functions. The benchmark was run on a 2019 MacBook Pro  
57 (2.4 GHz Quad-Core, 16GB RAM).

58



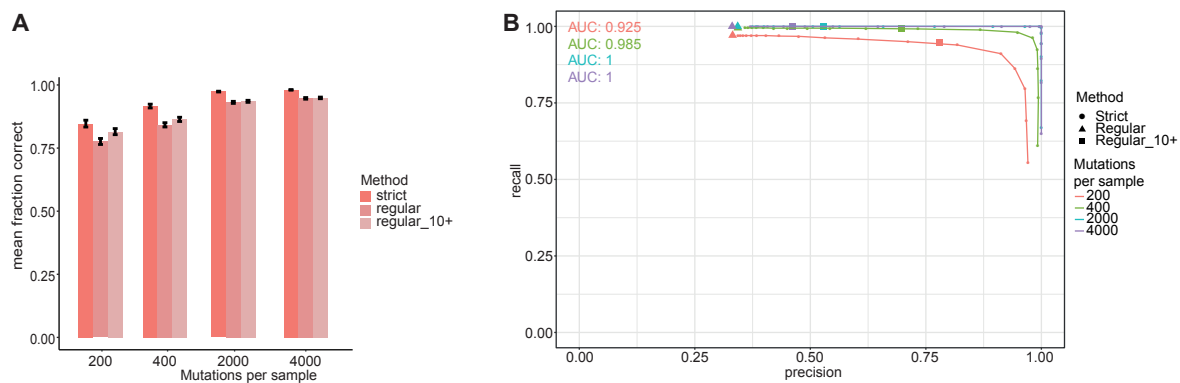

59

60 Fig. S10 Recall-precision plot of different refitting methods in MutationalPatterns

61 **a** Bar graph depicting the mean fraction of correctly attributed mutations for “regular”,  
 62 “regular\_10+” and “strict” refitting. This is shown for 4 experiments. Per experiment a  
 63 mutation matrix with 300 simulated samples, each containing 4 signatures, was generated.  
 64 The number of mutations per sample was respectively 200, 400, 2000 and 4000 for the 4  
 65 different experiments. The error bars show the 95% confidence interval. The fraction of  
 66 correctly attributed mutations is calculated as 1 minus the absolute difference between the  
 67 real and estimated contribution divided by the sum of the real and estimated contribution.  
 68 **b** Recall-precision plot showing the recall (sensitivity) and precision of the “strict” method  
 69 when different “max\_delta” cutoffs are used for signature refitting. The recall and precision  
 70 of the “regular” and “regular\_10+” methods are also shown with respectively triangles and  
 71 squares. Since these methods don’t have a “max\_delta” cutoff only a single point can be  
 72 shown for them. This is shown for 4 experiments. Per experiment a mutation matrix with  
 73 300 simulated samples, each containing 4 signatures, was generated. The number of  
 74 mutations per sample was respectively 200, 400, 2000 and 4000 for the 4 different  
 75 experiments. The area under the curve (AUC) is shown per experiment.

76

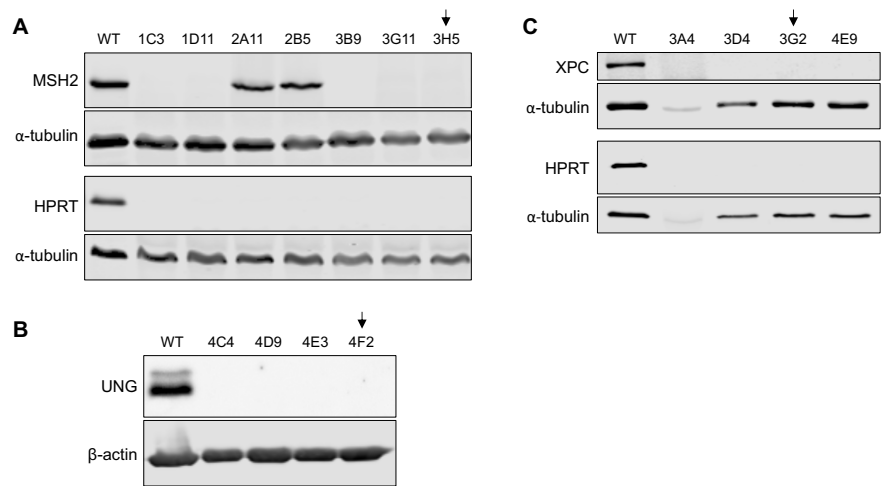

77

78 Fig. S11 Western blot analysis of AHH-1 CRISPR-Cas9 edited clonal lines

79 **a** Western blot of total protein lysate of bulk AHH-1 (WT) or single cell clones generated after  
80 transfection with CRISPR-Cas9 plasmids targeting *MSH2* and *HPRT*. All clones are *HPRT*  
81 knockout, and 5/7 clones are also knockout for *MSH2*.  $\alpha$ -Tubulin staining was done on the  
82 same membrane as the indicated protein above. **b** Western blot of total protein lysate of bulk  
83 AHH-1 (WT) or single cell clones generated after transfection with CRISPR-Cas9 plasmids  
84 targeting *UNG* and *HPRT*. All clones are knockout for *UNG* and *HPRT* (*HPRT* blot not shown).  
85  $\beta$ -actin staining was done on the same membrane as *UNG* staining. **c** Western blot of total  
86 protein lysate of bulk AHH-1 (WT) or single cell clones generated after transfection with  
87 CRISPR-Cas9 plasmids targeting *XPC* and *HPRT*. All clones are *HPRT* and *MSH2* knockout.  $\alpha$ -  
88 Tubulin staining was done on the same membrane as the indicated protein above. Arrows  
89 indicate clones selected for a second clonal step and whole genome sequencing. Full-length  
90 blots/gels are presented in Additional file 1: Figure S12.

91

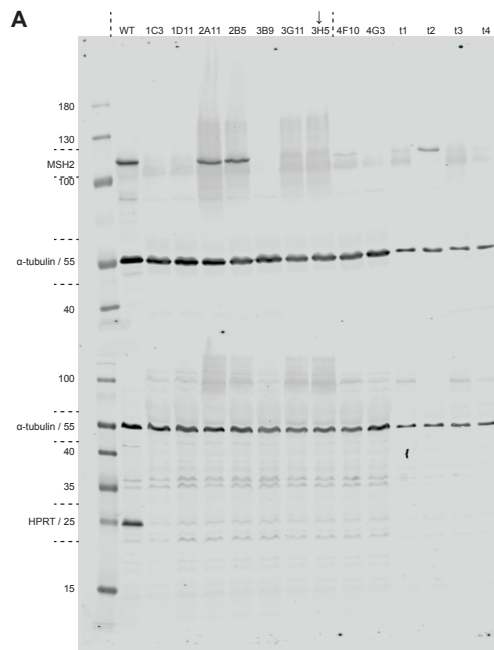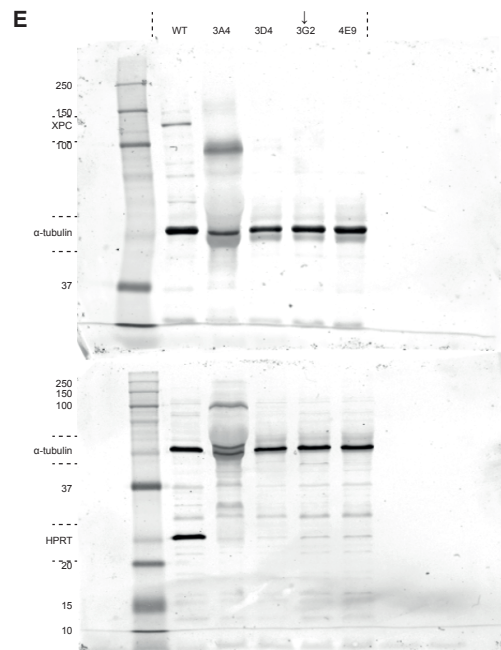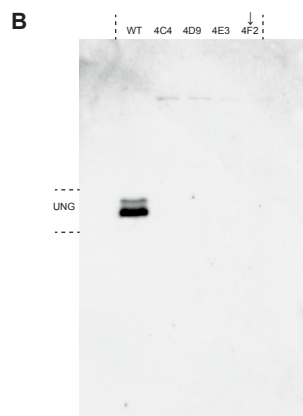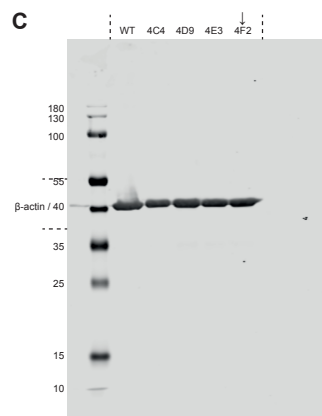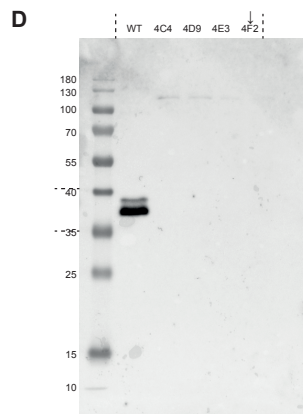

95 Fig. S12 Uncropped original version of the western blots in Fig. S11

96 The vertical and horizontal dashed lines indicate the crop marks. Standard protein size

97 markers have been labeled with the expected molecular weight in kDa. **a** Corresponds to Fig.

98 S11a. **b**, **c** and **d** correspond to Fig. S11b. The UNG image was developed using ECL (b),

99 whereas the b-actin and protein ladder were imaged using fluorescent antibodies (c). A

100 composite image of (b) is shown in (d), which includes the brightfield image of the same

101 membrane that contains the protein ladder. **e** Corresponds to Fig. S11c. PageRuler Prestained

102 Protein Ladder was used for (a), (b), (c), and (d). Precision Plus Protein WesternC Standards

103 was used for (e).

104

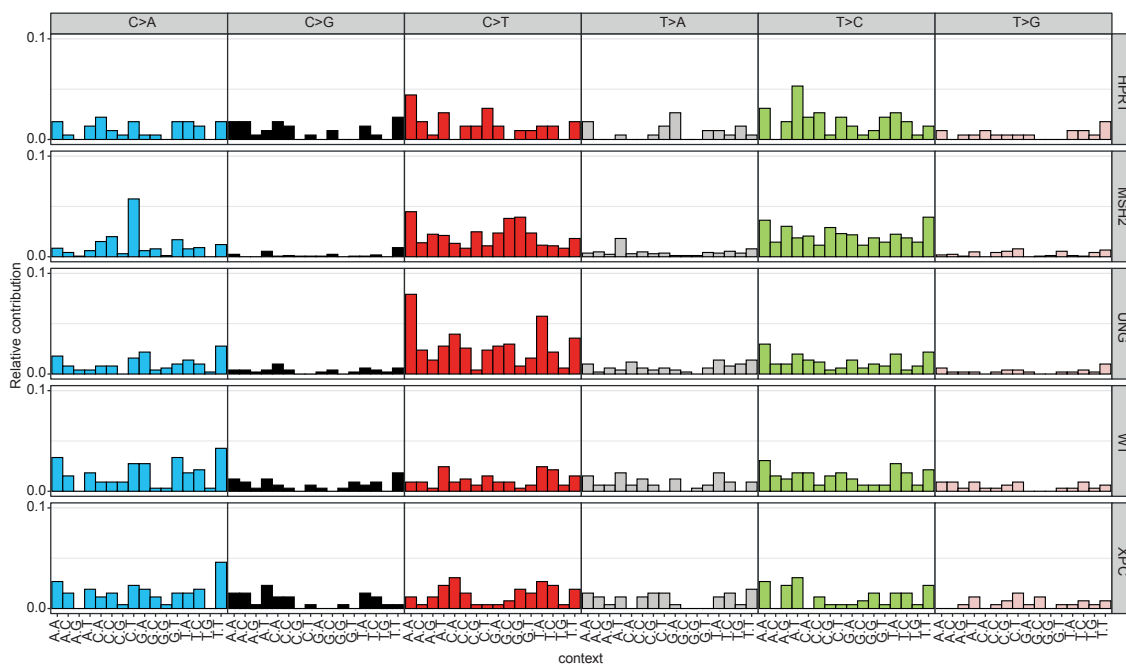

105

106 Fig. S13 SBS profiles of knockout samples

107 Relative contribution of each trinucleotide change to the point mutation spectrum for each

108 sample.
