# Supplementary material for: MutationalPatterns: the one stop shop for the analysis of mutational processes
Source: PubMed Central journal article supplement (PMC8845394; doi:10.1186/s12864-022-08357-3), 2022-02-15
Supplement: 12864_2022_8357_MOESM2_ESM.pdf [file 12864_2022_8357_MOESM2_ESM.pdf]

## 1 **Methods**

### 2 **Cell lines**

3 AHH-1 cells, a human B lymphoblastoid cell line, were obtained from ATCC. Cells were  
4 cultured in RPMI 1640 medium (Gibco) with 2 mM L-glutamine, 1.5 g/L sodium bicarbonate,  
5 4.5 g/L glucose, 10 mM HEPES, 1.0 mM sodium pyruvate, 10% heat-inactivated horse serum  
6 and penicillin/streptomycin. Low-passage cells were used for transfection experiments.

### 8 **CRISPR-Cas9 gene editing**

9 The human codon-optimized Cas9 expression plasmid was obtained from Addgene (px330-  
10 U6-Chimeric\_BB-CBh-hSpCas9). The gRNA sequences were inserted by BbsI digestion and T4  
11 ligation as described (Ran et al., 2013). sgRNA target sequences: hHPRT-sgRNA 5'-  
12 GGCTTATATCCAACACTTCG-3', hMSH2-sgRNA 5'-ACAAAGACTTGTTAACCAG-3', hUNG-sgRNA  
13 5'-TCGGCACTCAGCGGCGAGGA-3', hXPC-sgRNA 5'-AAAGATTGACTGCGGATCC-3'. To generate  
14 DNA repair gene knockout lines, single cell suspensions of AHH-1 cells were co-transfected  
15 with Cas9- and sgRNA-expressing px330 plasmids, targeting *HPRT* and either *MSH2*, *UNG* or  
16 *XPC*. Plasmid DNA was mixed in an equal ratio and combined with Lipofectamine 2000.  
17 Transfection was performed according to manufacturer's instructions in AHH-1 medium with  
18 1% horse serum. After 3 hours, complete AHH-1 medium (10% horse serum) was added to  
19 the cells and cells were cultured for 6 days. On day 6, 0.5 µg/mL 6-thioguanine (6-TG) was  
20 added to the cells after making single cell suspensions to select for *HPRT* knockout cells. On  
21 day 19, cells growing on 6-TG were plated in limiting dilutions to obtain single cell clones.  
22 Growing clones were analyzed by PCR and Western blot for knockout of *HPRT* and *MSH2*,  
23 *UNG* or *XPC*. Selected clones were subjected to another round of limiting dilutions to obtain  
24 subclones of the selected clones.

25

## 26 **Western blot**

27 Cell pellets were directly lysed in sample buffer (62.5 mM Tris-HCl, 2.5% SDS, 10% glycerol,  
28 0.002% bromophenol blue, 100 mM DTT). Total protein lysates were loaded on SDS-PAGE gels  
29 (XPC + MSH2: 8%, UNG + HPRT: 12%) and transferred to nitrocellulose membranes (BioRad).  
30 Membranes were blocked and probed with antibodies directed against HPRT (ab10479,  
31 Abcam), MSH2 (D24B5, Cell Signaling Technology), UNG (OT11A11, ThermoFisher Scientific),  
32 XPC (12701, Cell Signaling Technology),  $\beta$ -actin (RM112, Sigma-Aldrich) and  $\alpha$ -tubulin (B-5-1-  
33 2, Sigma-Aldrich). PageRuler Prestained Protein Ladder (26617, Thermo Scientific) and  
34 Precision Plus Protein WesternC Standards (5561, Bio-Rad) were used as protein standards,  
35 where indicated. Membranes stained by fluorescent antibodies were scanned using the  
36 Odyssey CLx (LI-COR). Images were exported using Image Studio 5.2 (LI-COR). Membranes  
37 stained by ECL antibodies were developed using Pierce™ ECL Western Blotting Substrate  
38 (32106, Thermo Scientific) and scanned using the ChemiDoc™ Touch Imaging System (Bio-  
39 Rad). ECL images were processed using the on-board Image Lab. All image processing was  
40 restricted to linear adjustments (brightness, contrast) to visualize the bands. Subsequently,  
41 colored images were converted to greyscale using ImageJ 2.0.0-rc-69/1.52i.

42

## 43 **Whole genome sequencing and read alignment**

44 DNA libraries for Illumina sequencing were generated by using standard protocols (Illumina)  
45 from 500 ng of genomic DNA isolated from the clonally expanded AHH-1 cells using QIAamp  
46 DNA Blood & Tissue Kit (QIAGEN) according to manufacturers' instructions. All samples were  
47 sequenced (2 × 150 bp) by using Illumina HiSeq X Ten or NovaSeq 6000 sequencers to 30X  
48 base coverage. Whole genome sequencing data was mapped against human reference

49 genome GRCh38 by using Burrows-Wheeler Aligner v0.7.5a mapping tool (Li and Durbin,  
50 2010) with settings 'bwa mem -c 100 -M'. Sequence reads were marked for duplicates by  
51 using Sambamba v0.6.8 markdup. Full pipeline description and settings also available at:  
52 <https://github.com/UMCUGenetics/IAP>.

53

#### 54 **Mutation calling and filtering**

55 Raw variants were multisample-called by using the GATK HaplotypeCaller v3.8-1-0 (Depristo  
56 et al., 2011) and GATK-Queue v3.8-1-0 with default settings and additional option  
57 'EMIT\_ALL\_CONFIDENT\_SITES'. The quality of variant and reference positions was evaluated  
58 by using GATK VariantFiltration v3.8-1-0 with options -snpFilterName SNP\_LowQualityDepth  
59 -snpFilterExpression "QD < 2.0" -snpFilterName SNP\_MappingQuality -snpFilterExpression  
60 "MQ < 40.0" -snpFilterName SNP\_StrandBias -snpFilterExpression "FS > 60.0" -snpFilterName  
61 SNP\_HaplotypeScoreHigh -snpFilterExpression "HaplotypeScore > 13.0" -snpFilterName  
62 SNP\_MQRankSumLow -snpFilterExpression "MQRankSum < -12.5" -snpFilterName  
63 SNP\_ReadPosRankSumLow -snpFilterExpression "ReadPosRankSum < -8.0" -snpFilterName  
64 SNP\_HardToValidate -snpFilterExpression "MQ0 >= 4 && ((MQ0 / (1.0 \* DP)) > 0.1)" -  
65 snpFilterName SNP\_LowCoverage -snpFilterExpression "DP < 5" -snpFilterName  
66 SNP\_VeryLowQual -snpFilterExpression "QUAL < 30" -snpFilterName SNP\_LowQual -  
67 snpFilterExpression "QUAL >= 30.0 && QUAL < 50.0 " -snpFilterName SNP\_SOR -  
68 snpFilterExpression "SOR > 4.0" -cluster 3 -window 10 -indelType INDEL -indelType MIXED -  
69 indelFilterName INDEL\_LowQualityDepth -indelFilterExpression "QD < 2.0" -indelFilterName  
70 INDEL\_StrandBias -indelFilterExpression "FS > 200.0" -indelFilterName  
71 INDEL\_ReadPosRankSumLow -indelFilterExpression "ReadPosRankSum < -20.0" -

72 indelFilterName INDEL\_HardToValidate -indelFilterExpression "MQ0 >= 4 && ((MQ0 / (1.0 \*  
73 DP)) > 0.1)" -indelFilterName INDEL\_LowCoverage -indelFilterExpression "DP < 5" -  
74 indelFilterName INDEL\_VeryLowQual -indelFilterExpression "QUAL < 30.0" -indelFilterName  
75 INDEL\_LowQual -indelFilterExpression "QUAL >= 30.0 && QUAL < 50.0" -indelFilterName  
76 INDEL\_SOR -indelFilterExpression "SOR > 10.0". To obtain high-quality somatic mutation  
77 catalogs, we applied postprocessing filters as described (Blokzijl et al., 2016). Briefly, we  
78 considered variants at autosomal chromosomes without any evidence from a paired control  
79 sample (the original bulk culture used to generate the mutant lines); passed by  
80 VariantFiltration with a GATK phred-scaled quality score R 100; a base coverage of at least  
81 10X in the clonal and subclonal cultures, and paired control sample; mapping quality (MQ) of  
82 60; no overlap with single nucleotide polymorphisms (SNPs) in the Single Nucleotide  
83 Polymorphism Database v146; and absence of the variant in a panel of unmatched normal  
84 human genomes (BED-file available upon request). We additionally filtered heterozygous  
85 base substitutions with a GATK genotype score (GQ) lower than 99 in clonal or paired control  
86 samples. A GQ score of 10 was used for homozygous variants. For indels, we filtered variants  
87 with a GQ score lower than 99 in both clonal or subclonal culture, or paired control sample.  
88 A GQ of 20 was used for homozygous reference variants. (Blokzijl et al., 2016; Jager et al.,  
89 2018). Finally, we only considered variants with a variant allele frequency of  $\geq 0.3$  in the sub-  
90 clones and a variant allele frequency lower than 0.3 in the original paired clones. These  
91 variants specifically accumulated between the two clonal expansion steps. The script is  
92 available at: <https://github.com/ToolsVanBox/SMuRF>.

93

#### 94 **Additional references**

95 Blokzijl, F., de Ligt, J., Jager, M., Sasselli, V., Roerink, S., Sasaki, N., Huch, M., Boymans, S.,

96 Kuijk, E., Prins, P., et al. (2016). Tissue-specific mutation accumulation in human adult stem  
97 cells during life. *Nature* 538, 260–264.

98

99 Depristo, M.A., Banks, E., Poplin, R., Garimella, K. V., Maguire, J.R., Hartl, C., Philippakis, A.A.,  
100 Del Angel, G., Rivas, M.A., Hanna, M., et al. (2011). A framework for variation discovery and  
101 genotyping using next-generation DNA sequencing data. *Nat. Genet.* 43, 491–501.

102

103 Jager, M., Blokzijl, F., Sasselli, V., Boymans, S., Janssen, R., Besselink, N., Clevers, H., van  
104 Boxtel, R., and Cuppen, E. (2018). Measuring mutation accumulation in single human adult  
105 stem cells by whole-genome sequencing of organoid cultures. *Nat. Protoc.* 13, 59–78.

106

107 Li, H., and Durbin, R. (2010). Fast and accurate long-read alignment with Burrows-Wheeler  
108 transform. *Bioinformatics* 26, 589–595.

109

110 Ran, F.A., Hsu, P.D., Wright, J., Agarwala, V., Scott, D.A., and Zhang, F. (2013). Genome  
111 engineering using the CRISPR-Cas9 system. *Nat. Protoc.* 8, 2281–2308.

112
